# Supplementary material
Source: PubMed Central journal article supplement (PMC5176359)

**A**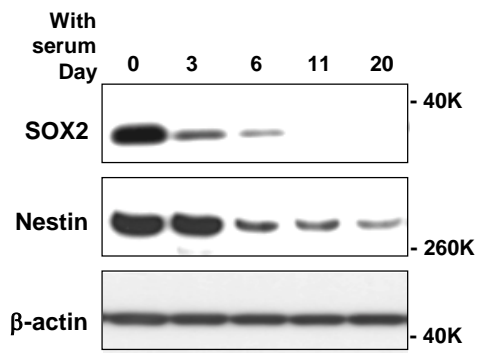**B**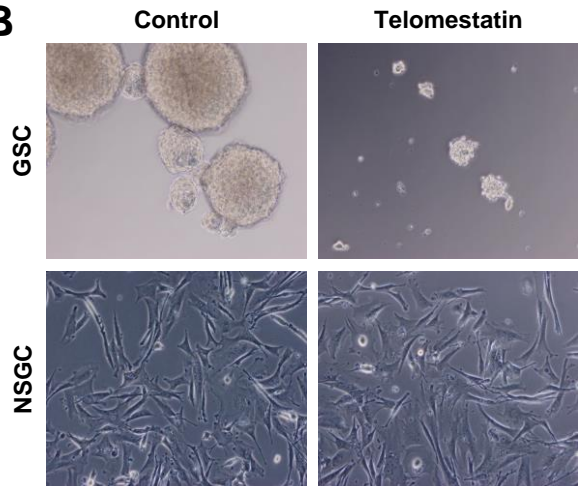**C**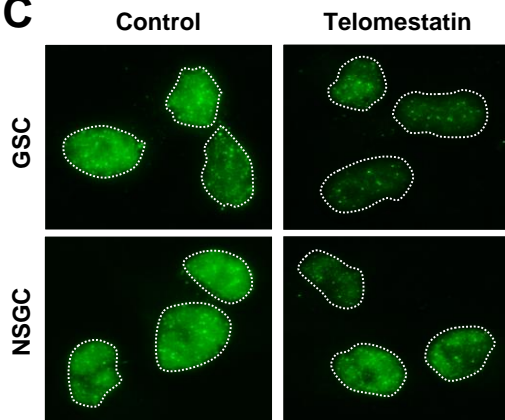**D**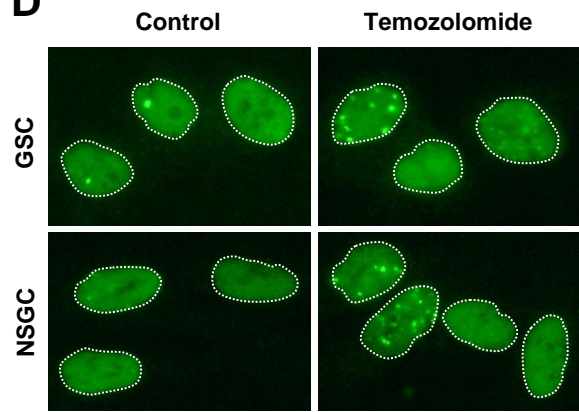

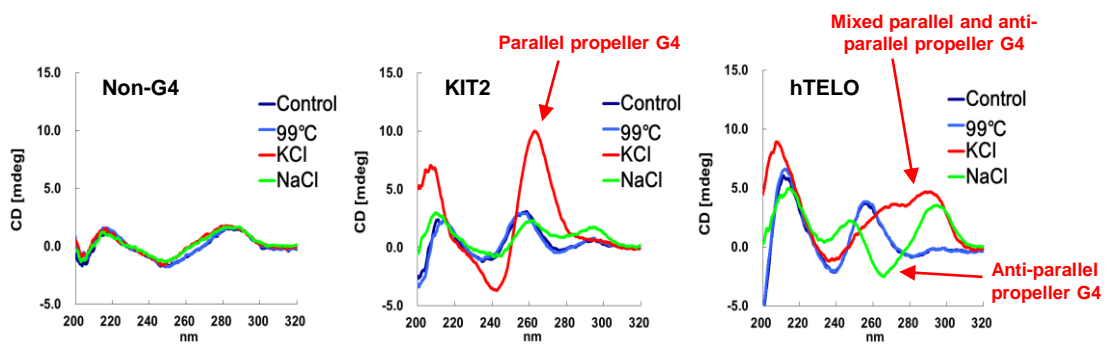

**A**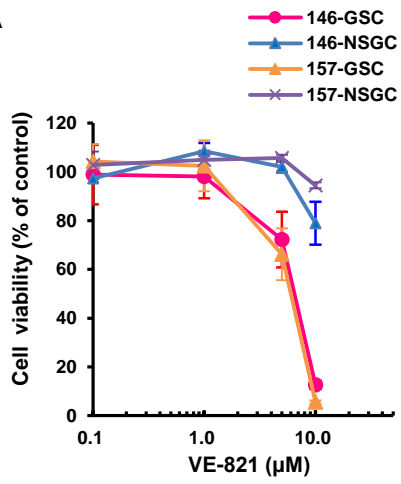**B**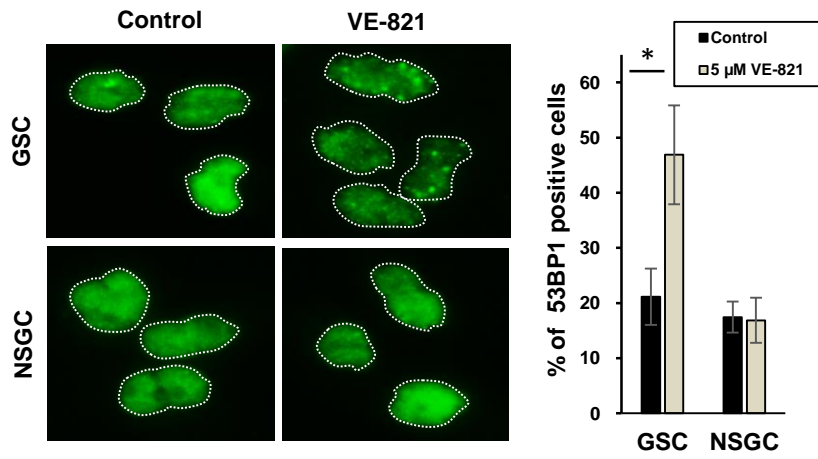

Supplement: NIHMS835191-supplement-Supplemental_Materials.pdf [file NIHMS835191-supplement-Supplemental_Materials.pdf]
